# Supplementary material for: The polydopamine-enhanced superadhesion and fracture strength of honeycomb polyurethane porous membranes
Source: Royal Society of Chemistry journal article supplement (doi:10.1039/c9ra07887h), 2020-01-01
Supplement: c9ra07887h1.pdf [file c9ra07887h1.pdf]

## **Polydopamine-enhanced superadhesion and fracture strength of honeycomb polyurethane porous membranes**

Mingshan Xue,<sup>1#</sup> Dan Zhou,<sup>1#</sup> Yuwei Ji,<sup>1</sup> Yu Xie,<sup>1,2\*</sup> Changquan Li,<sup>3</sup> Jinsheng Zhao<sup>2\*</sup>

*<sup>1</sup>School of Materials Science and Engineering, Nanchang Hangkong University, Nanchang 330063, People's Republic of China*

*<sup>2</sup>Department of Chemistry and Chemical Engineering, Liaocheng University, Liaocheng, 252059, People's Republic of China*

*<sup>3</sup>School of Materials and Engineering, Jiangsu University of Technology, Changzhou, Jiangsu 213001, People's Republic of China*

---

\* Corresponding author. Tel.: +86 791 83953408; fax: +86 791 83953373.

E-mail address: xieyu\_121@163.com (Y. Xie) and [j.s.zhao@163.com](mailto:j.s.zhao@163.com) (J. S. Zhao).

# These authors contributed equally to this work.

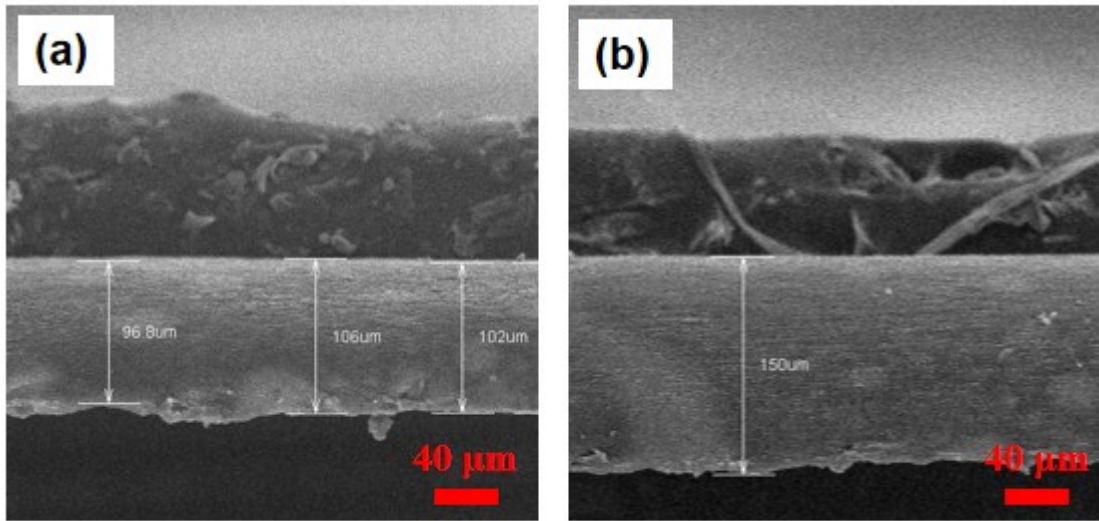

Fig.S1 Cross-sectional SEM images of PUPM (a) before and (b) after precipitating PDA with 3 g/L.

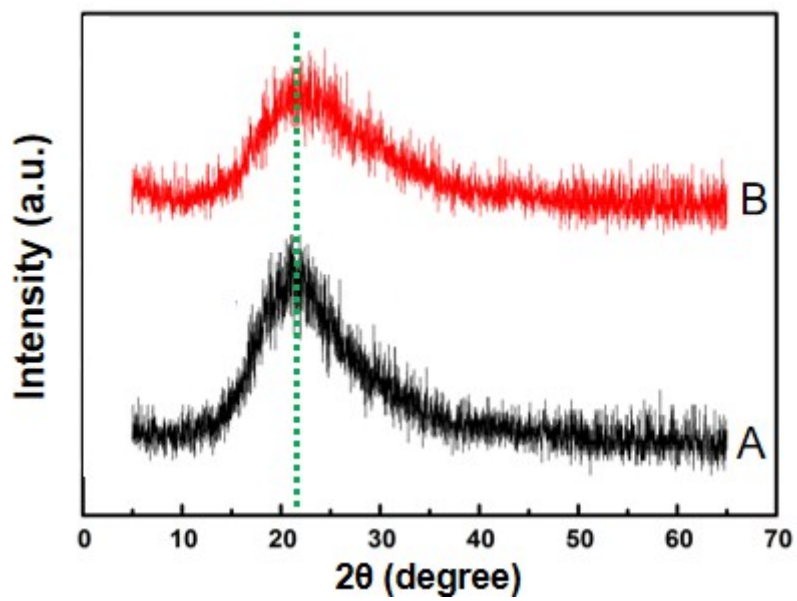

Fig.S2 XRD spectra of PUPM corresponding to (A) before and (B) after precipitating PDA.

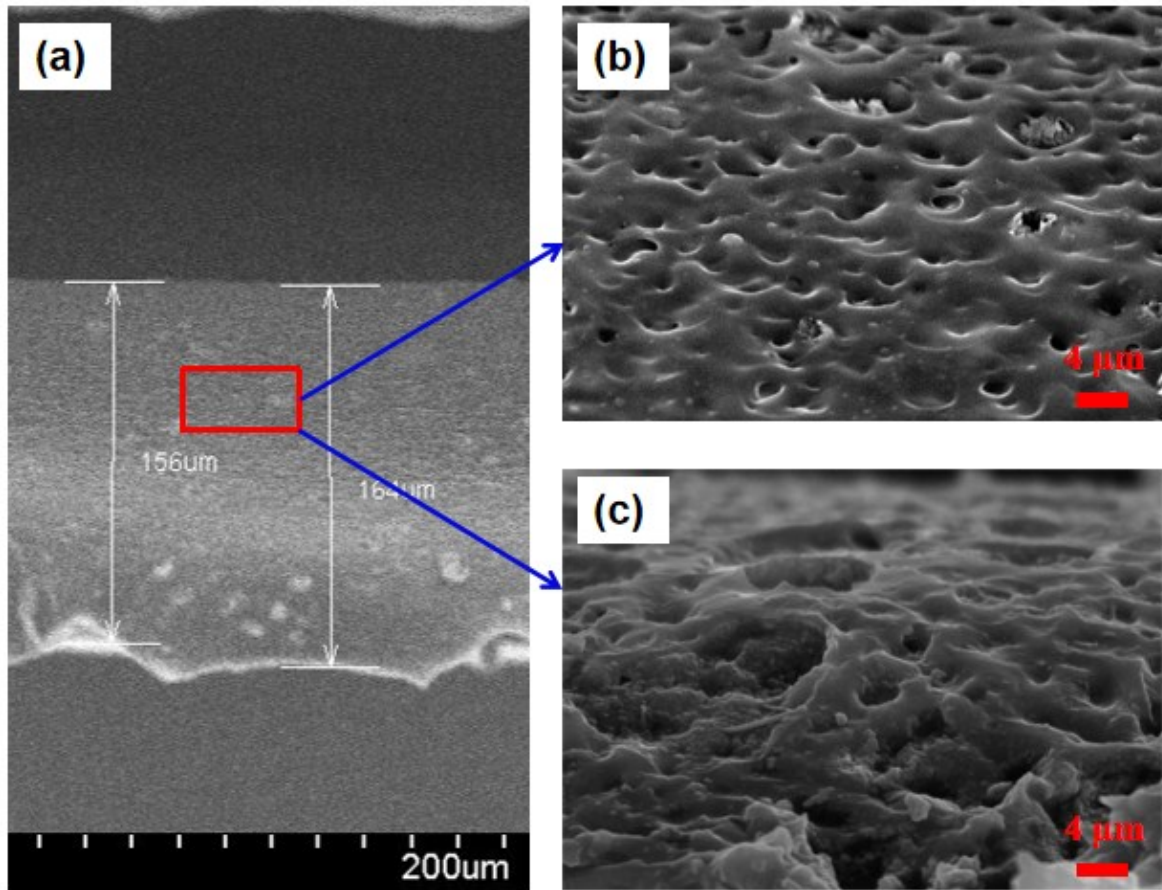

Fig.S3 Cross-sectional SEM images of PUPM precipitating PDA with 3 g/L: (a-b) before and (c) after fracture strength testing.
